# Supplementary material for: The formation and characterisation of ultra-thin films containing Ag nanoparticles
Source: Royal Society of Chemistry journal article supplement (doi:10.1039/b713313h), 2007-11-12
Supplement: b713313h.pdf [file b713313h.pdf]

## **Electronic Supplementary Information to:**

# **The Formation and Characterisation of Ultra-Thin Films Containing Ag Nanoparticles**

**Kirsi Yliniemi<sup>a</sup>, Marjatta Vahvaselkä<sup>b</sup>, Yves Van Ingelgem<sup>c</sup>, Kitty Baert<sup>c</sup>, Benjamin P. Wilson<sup>a</sup>, Herman Terryn<sup>c</sup> and Kyösti Kontturi<sup>\*a</sup>**

*<sup>a\*</sup>Laboratory of Physical Chemistry and Electrochemistry, Helsinki University of Technology, P.O. Box 6100, FI-02015 TKK, Finland, FAX: +358 9 451 2580, Tel: +358 9 451 2570, E-mail: kyosti.kontturi@tkk.fi*

*<sup>b</sup>Laboratory of Biochemistry and Microbiology, Helsinki University of Technology, P.O. Box 6100, FI-02015 TKK, Finland*

*<sup>c</sup>Dept. Metallurgy, Electrochemistry and Materials Science, Vrije Universiteit Brussel V.U.B., Pleinlaan 2, 1050 Brussels, Belgium*

### **1. Atomic Force Microscope**

The average size of Ag nanoparticles on the annealed sample (after Step 3) can be determined from AFM images. A typical AFM image and height profile is presented in fig S1.

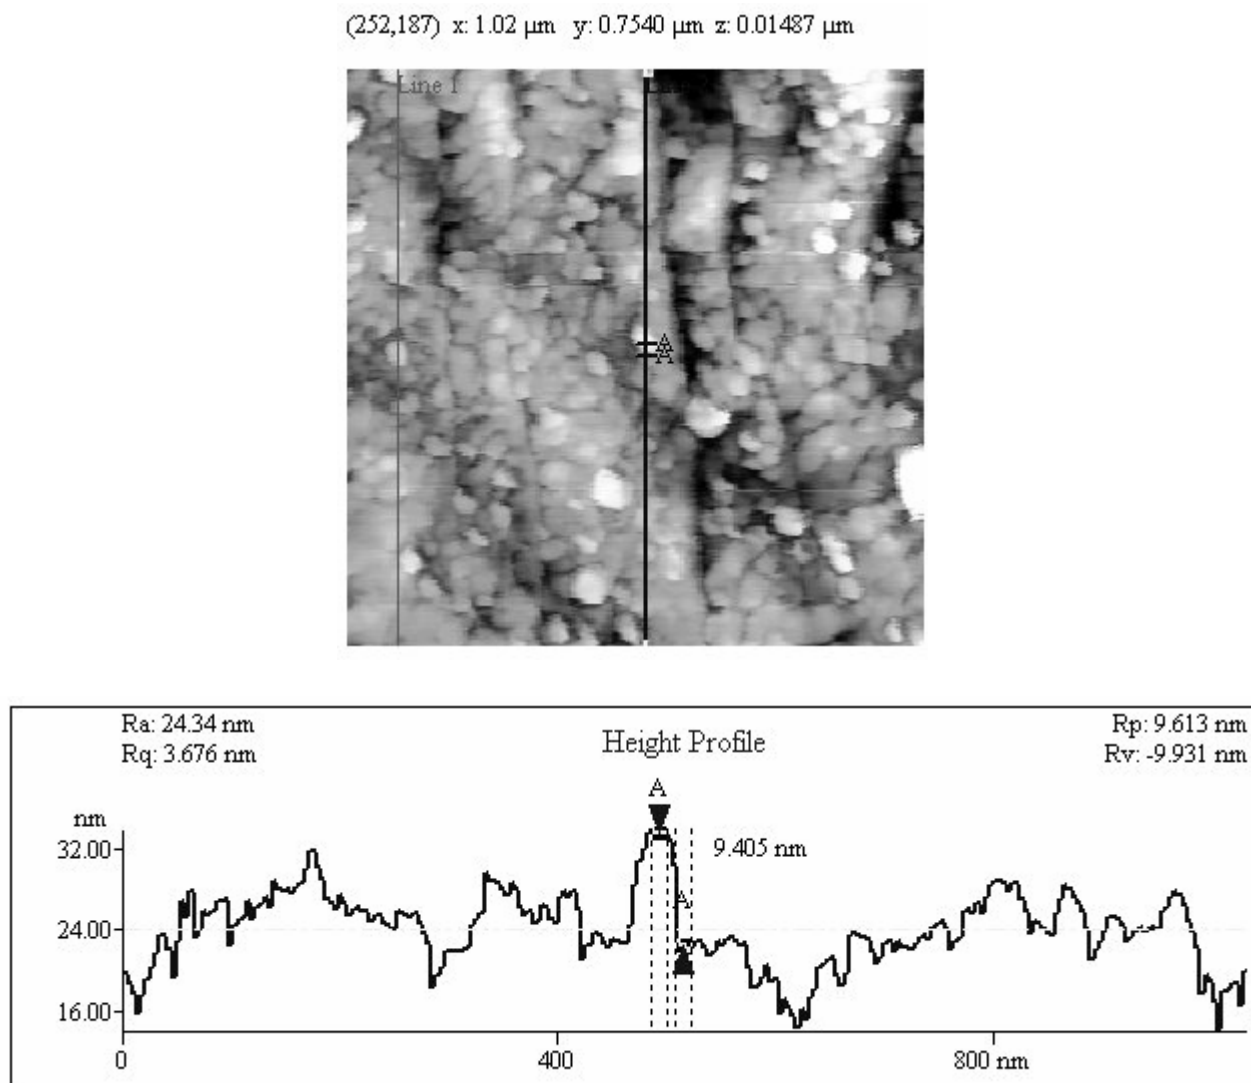

**Fig. S1.** A typical AFM image of a sample after Step 3 (annealed 120°C for 2h) and a height profile for the calculation of the size of Ag nanoparticles.

## **2. Field Emission Auger Electron Microscope**

To confirm the homogenous nature of the film, both the maps of N and Si peak intensities of pure DIAMO coated sample (after annealing at 120°C for 2h) were measured and they are presented in Fig. S2.

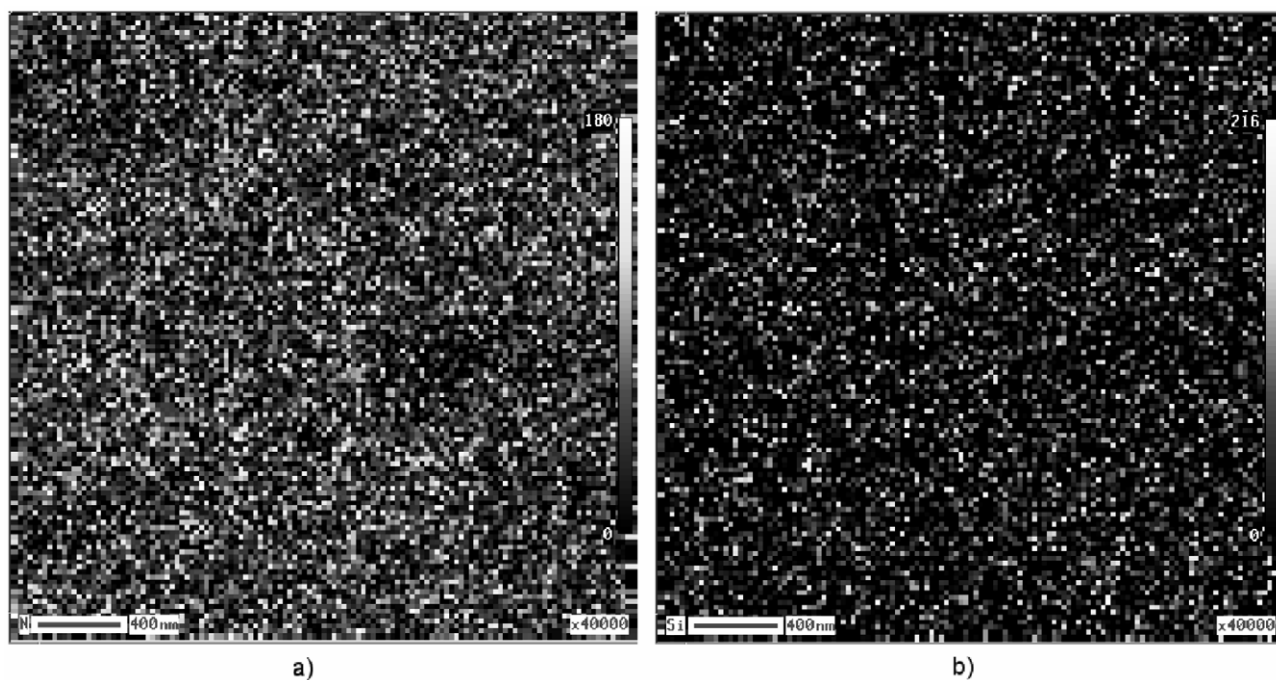

**Fig. S2.** Maps of peak intensities of a pure DIAMO coated sample (after Step 1 plus annealing at 120°C for 2h): a) map of N peak intensity and b) map of Si peak intensity.
